# Supplementary material for: Disruption of retinal inflammation and the development of diabetic retinopathy in mice by a CD40-derived peptide or mutation of CD40 in Müller cells
Source: PubMed Central journal article supplement (PMC9630214; doi:10.1007/s00125-022-05775-6), 2022-08-03
Supplement: 125_2022_5775_MOESM1_ESM.pdf [file 125_2022_5775_MOESM1_ESM.pdf]

# **Disruption of retinal inflammation and the development of diabetic retinopathy in mice by a CD40-derived peptide or mutation of CD40 in Müller cells**

Jose-Andres C. Portillo<sup>1</sup>, Jin-Sang Yu<sup>1</sup>, Sarah Vos<sup>1</sup>, Reena Bapputty<sup>2</sup>, Yalitzza Lopez Corcino<sup>1</sup>, Alyssa Hubal<sup>1,3</sup>, Jad Daw<sup>1</sup>, Sahil Arora<sup>1</sup>, Wenyu Sun<sup>4</sup>, Zheng-Rong Lu<sup>4</sup> and Carlos S. Subauste<sup>1,3</sup>

<sup>1</sup>Division of Infectious Diseases and HIV Medicine, Department of Medicine, Case Western Reserve University, Cleveland, OH, USA

<sup>2</sup>Department of Pediatrics, Case Western Reserve University, Cleveland, OH, USA

<sup>3</sup>Department of Pathology, Case Western Reserve University, Cleveland, OH, USA

<sup>4</sup>Department of Biomedical Engineering, Case Western Reserve University, Cleveland, OH, USA

## ESM METHODS

### *Transgenic mice*

Transgenic mice with conditional expression of WT mouse CD40 restricted to Müller cells were previously described [1]. A similar approach was used to generate transgenic mice with conditional expression of CD40 mutants. Briefly, constructs that encode mouse WT *Cd40*, mouse *Cd40* with a previously described mutation that deletes the CD40-TRAF2,3 binding sites [2] and ablates binding to TRAF2 and TRAF3 [3] (CD40  $\Delta$ TRAF2,3), or mouse CD40 with previously described point mutations in the TRAF6 binding site (QDGQAMED) [2] that prevents binding to TRAF6 [4] (CD40  $\Delta$ TRAF6) were inserted into the *Eco* RI and *Bam* HI sites of the pTet<sup>os</sup> plasmid [5]. After sequence verification, transgenes were excised by *Sal* I digestion [5]. Transgenes were microinjected into mouse oocytes (C57BL/6J; B6). Founder Tet<sup>os</sup>-*Cd40* mice (either WT or mutant *Cd40*) were identified by PCR using the primers: Tet<sup>os</sup>*Cd40* Forward: 5'-GCAACGTGCTGGTTATTGTG-3', Reverse: 5'-CCGGGACTTTAAACCACAGA-3'. The driver line consisted of transgenic mice that express tetracycline (Tet)-repressible transactivator (tTA) under the control of the *GFAP* promoter *gfa2* [6]. Homozygous Tet<sup>os</sup>-*Cd40* encoding either WT or mutant *Cd40* (responder) and heterozygous *GFAP*-tTA (driver) transgenic mice [6] (both B6) were backcrossed onto a *Cd40*<sup>-/-</sup> (B6) background. To confirm that mice were *Cd40*<sup>-/-</sup>, animals were genotyped using primers that detect endogenous *Cd40* and mutant *Cd40* (neomycin cassette inserted into exon 3 resulting in lack of functional Cd40) [7]. Both lines of mice were bred and offspring identified by PCR analysis of genomic DNA. PCR primers for *Cd40* and tTA were obtained from The Jackson Laboratory (Bar Harbor, ME). Littermates that inherited only one transgene (single transgenic and non-expressing) served as controls (Trg-Ctr) for double transgenic animals (Trg-CD40; exhibiting promoter-specific expression of WT or mutant CD40).

### *Antibodies*

Retinal sections were incubated with biotinylated anti-CD40 mAb (3/23, BioLegend, San Diego, CA; 1:50), anti-CRALBP (15356-1-AP, Proteintech Group, Rosemont, IL; 1:200), anti-vimentin (Novus Biologicals, Littleton, CO; 1:300), anti-glutamine synthetase (GTX630654, GeneTex, Irvine, CA; 1:1000), anti-Iba-1 Ab (019-19741, Wako Chemicals, Richmond, VA; 1:250), Tomato Lectin DyLight 488 (Vector Laboratories, Burlingame, CA; 1:100), anti-ICAM-1 (KAT-1, eBiosciences, San Diego, CA; 1:100), anti-TNF- $\alpha$  (52B83, Abcam, Cambridge, UK; 1:25), anti-CCL2 Ab (2D8, Novus Biologicals; 1:1000), anti-P2X<sub>7</sub> (AP09521PU-N, Origene, Rockville, MD; 1:100) or biotinylated anti-phospho-Tyr783 PLC $\gamma$ 1 (BS-3343-R, Bioss, Woburn, MA; 1:500) Abs. Abs were diluted in PBS plus 0.3% Triton X-100 and 1-5% normal goat or mouse serum (Jackson ImmunoResearch Laboratories, West Grove, PA, USA). Ab specificity was assessed by omitting primary Ab and, in the case of anti-CD40 mAb, by staining eyes from *Cd40*<sup>-/-</sup> mice.

In the case of immunoblots, membranes were probed with antibody to PLC $\gamma$ 1 (5690S; 1:4000), phospho-Tyr783 PLC $\gamma$ 1 (2821S; 1:2000), Src (2108S; 1:3000), phospho-Tyr416 Src (6943S; 1:2000), I $\kappa$ B $\alpha$  (4814P; 1:1000), phospho-Ser32 I $\kappa$ B $\alpha$  (2859S; 1:1000), JNK (9252S; 1:2000), phospho-Thr183/Tyr185 JNK (4668S; 1:3000), ERK1/2 (4695T; 1:5000), phospho-Thr202/Tyr204 ERK1/2 (4370T; 1:3000), p38 MAPK (8690T; 1:3000), phospho-Thr180/Tyr182 p38 MAPK (4511T; 1:2000), TRAF2 (4712T; 1:2000), TRAF6 (8028T; 1:2000; all from Cell Signaling Technologies, Danvers, MA) or actin (sc47778; 1:10000; Santa Cruz Biotechnologies, Santa Cruz, CA).

### *RNAi-mediated silencing*

SMARTPool siRNAs (ON-TARGETplus) for human TRAF2, TRAF6, PLC $\gamma$ 1 and non-targeting siRNA were obtained from Horizon Discovery (Cambridge, UK). RNAi mediated silencing of Src was reported previously [8, 9]. Cells were transfected with siRNA (50 nM) using TransIT-X2 Dynamic Delivery System (Mirus, Madison, WI).

### *Flow cytometry*

Human Müller cells were incubated with anti-CD40 (5C3), anti-ICAM-1 (555511, both BD Biosciences) or isotype control mAbs. Retinal cell suspensions from mice were obtained by digestion with papain (15 IU/ml)/DNase (15  $\mu$ g/ml; Worthington Biochemicals, Freehold, NJ) as described [10]. Cells were incubated with anti-CD40 (124605; BioLegend), anti-CD29 (HM  $\beta$ 1-1, BD Biosciences, San Jose, CA) or isotype control antibodies. Flow cytometry data were acquired using an LSR II and running FACSDiva software. Expression of CD40 was analyzed on CD29<sup>+</sup> (Müller) cells.

### *Measurement of extracellular ATP*

The ecto-ATPase inhibitor  $\beta$ ,  $\gamma$ -methylene-ATP (300  $\mu$ mol/l; Sigma-Aldrich, St Louis, MO) was added 15 min prior to stimulation with CD154. Extracellular ATP was quantified using an ATP bioluminescence assay kit and an ATP standard curve (Sigma-Aldrich) [11].

## References

- [1] Portillo J-AC, Lopez Corcino Y, Miao Y, et al. (2017) CD40 in retinal Müller cells induces P2X<sub>7</sub>-dependent cytokine expression in macrophages/microglia in diabetic mice and development of early experimental diabetic retinopathy in mice. *Diabetes* 66: 483-493
- [2] Subauste CS, Andrade RM, Wessendarp M (2007) CD40-TRAF6 and autophagy-dependent anti-microbial activity in macrophages. *Autophagy* 3: 245-248
- [3] Hsing Y, Hostager BS, Bishop GA (1997) Characterization of CD40 signaling determinants regulating nuclear factor-kappa B activation in B lymphocytes. *J Immunol* 159: 4898-4906
- [4] Jalukar SV, Hostager BS, Bishop GA (2000) Characterization of the roles of TNF receptor-associated factor 6 in CD40-mediated B lymphocyte effector functions. *J Immunol* 164: 623-630
- [5] Sarao R, Dumont DJ (1998) Conditional transgene expression in endothelial cells. *Transgenic Res* 7: 421-427
- [6] Lin W, Kemper A, McCarthy KD, et al. (2004) Interferon- $\gamma$  induced medulloblastoma in the developing cerebellum. *J Neurosci* 24: 10074-10083
- [7] Kawabe T, Naka T, Yoshida K, et al. (1994) The immune responses in CD40-deficient mice: impaired immunoglobulin class switching and germinal center formation. *Immunity* 1(3): 167-178
- [8] Muniz-Feliciano L, Van Grol J, Portillo J-AC, et al. (2013) *Toxoplasma gondii*-induced activation of EGFR prevents autophagy protein-mediated killing of the parasite. *PLoS Pathog* 9: e1003809
- [9] Portillo JC, Muniz-Feliciano L, Lopez Corcino Y, et al. (2017) *Toxoplasma gondii* induces FAK-Src-STAT3 signaling during infection of host cells that prevents parasite targeting by autophagy. *PLoS Pathog* 13(10): e1006671.
- [10] Portillo J-AC, Okenka G, Kern TS, Subauste CS (2009) Identification of primary retinal cells and ex vivo identification of pro-inflammatory molecules in retinal cells using flow cytometry. *Mol Vis* 15: 1383-1389
- [11] Blum AE, Joseph SM, Przybylski RJ, Dubyak GR (2008) Rho-family GTPases modulate Ca<sup>2+</sup>-dependent ATP release from astrocytes. *Am J Physiol Cell Physiol* 295(1): C231-241.

**ESM Table 1.** Average weight, blood glucose and HbA<sub>1c</sub> in control and diabetic mice

| Strain         | Duration (m) | n | Weight (g) | Glucose (mmol/l) | HbA <sub>1c</sub> (mmol/mol) | HbA <sub>1c</sub> (%) |            |
|----------------|--------------|---|------------|------------------|------------------------------|-----------------------|------------|
| B6             | ND           | 2 | 23         | 28.1 ± 0.5       | 7.51 ± 1.8                   | 1                     | 1.9 ± 0.2  |
|                | DM           | 2 | 43         | 26.3 ± 0.7       | 25 ± 0.8                     | 57                    | 7.4 ± 0.4  |
| Trg-Ctr        | ND           | 2 | 17         | 27.0 ± 0.4       | 7.2 ± 0.2                    | 1                     | 2.0 ± 0.2  |
|                | DM           | 2 | 26         | 24.4 ± 0.4       | 25.1 ± 0.9                   | 53                    | 7.0 ± 0.3  |
| Trg-CD40 WT    | ND           | 2 | 19         | 28.1 ± 0.6       | 7.3 ± 1                      | 2                     | 2.3 ± 0.3  |
|                | DM           | 2 | 34         | 23.8 ± 0.4       | 25.7 ± 0.7                   | 54                    | 7.1 ± 0.3  |
| Trg-CD40 ΔT2,3 | ND           | 2 | 12         | 28.0 ± 0.4       | 7.3 ± 0.2                    | 1                     | 2.0 ± 0.2  |
|                | DM           | 2 | 18         | 24.4 ± 0.7       | 25.5 ± 0.8                   | 55                    | 7.2 ± 0.3  |
| Trg-CD40 ΔT6   | ND           | 2 | 8          | 29.1 ± 1.1       | 7.4 ± 0.3                    | 1                     | 1.9 ± 0.2  |
|                | DM           | 2 | 8          | 23.4 ± 0.7       | 26.1 ± 0.8                   | 55                    | 7.2 ± 0.3  |
| B6             | ND           | 8 | 6          | 36 ± 2.4         | 7.7 ± 0.5                    | 16                    | 3.6 ± 0.1  |
|                | DM           | 8 | 8          | 27 ± 1.3         | 27.5 ± 1.4                   | 100                   | 11.3 ± 0.9 |
| Trg-Ctr        | ND           | 8 | 6          | 34.6 ± 2.5       | 7.6 ± 0.4                    | 15                    | 3.5 ± 0.1  |
|                | DM           | 8 | 6          | 26 ± 0.5         | 27.4 ± 1.5                   | 98                    | 11.1 ± 0.7 |
| Trg-CD40 WT    | ND           | 8 | 6          | 35 ± 2.3         | 7.5 ± 0.6                    | 15                    | 3.5 ± 0.1  |
|                | DM           | 8 | 8          | 25.5 ± 0.5       | 27.0 ± 2.0                   | 104                   | 11.7 ± 1   |
| Trg-CD40 ΔT2,3 | ND           | 8 | 6          | 34.6 ± 2.5       | 7.2 ± 0.4                    | 15                    | 3.5 ± 0.1  |
|                | DM           | 8 | 7          | 25 ± 2.7         | 27.9 ± 1.5                   | 107                   | 11.9 ± 0.9 |

ND, Non-diabetic; DM, Diabetic

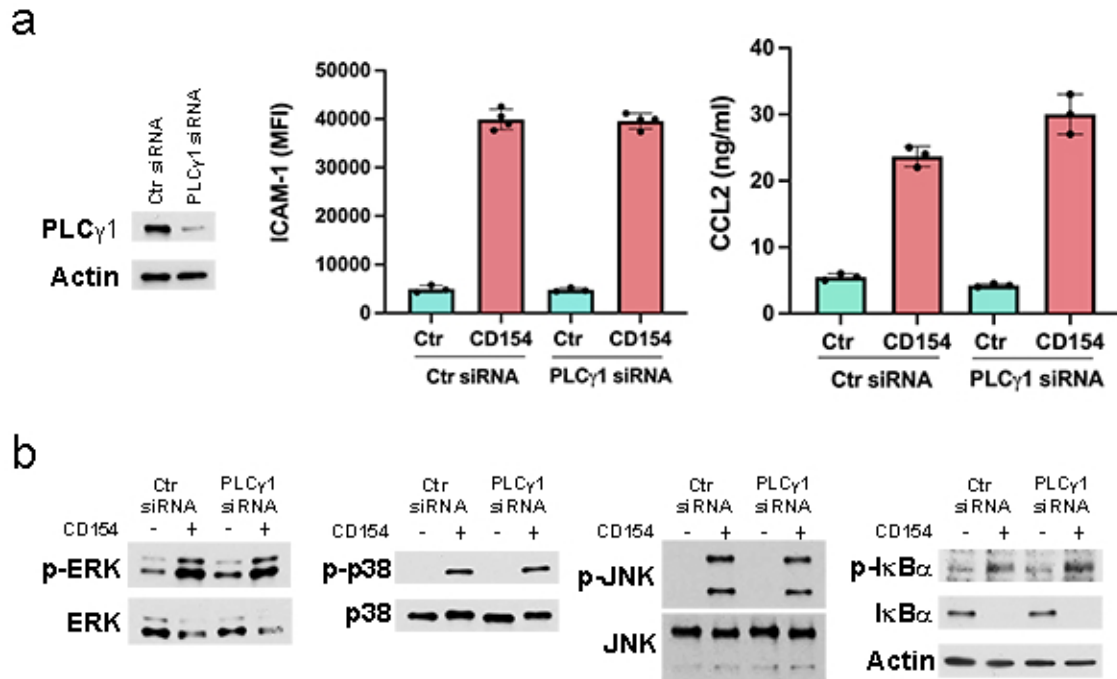

**ESM Fig. 1.** PLC $\gamma$ 1 is not required for upregulation ICAM-1 and CCL2 in Müller cells as well as for activation of signaling molecules that drive expression of these pro-inflammatory molecules. Human Müller cells were transfected with control or PLC $\gamma$ 1 siRNA. *a*, Immunoblot confirmed knockdown of PLC $\gamma$ 1. Müller cells were stimulated with or without CD154. ICAM-1 expression was examined by flow cytometry while CCL2 production was examined by ELISA (both at 24 h). *b*, Phosphorylation of ERK1/2, JNK, p38 MAPK and NF $\kappa$ B were examined at 30 min. Representative results of 2-3 different experiments.

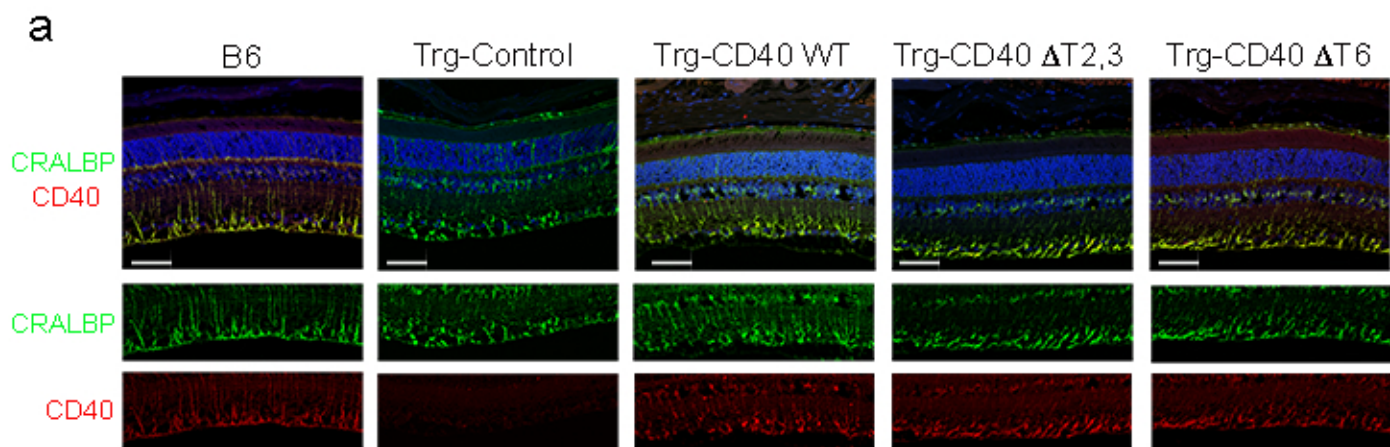

**b**

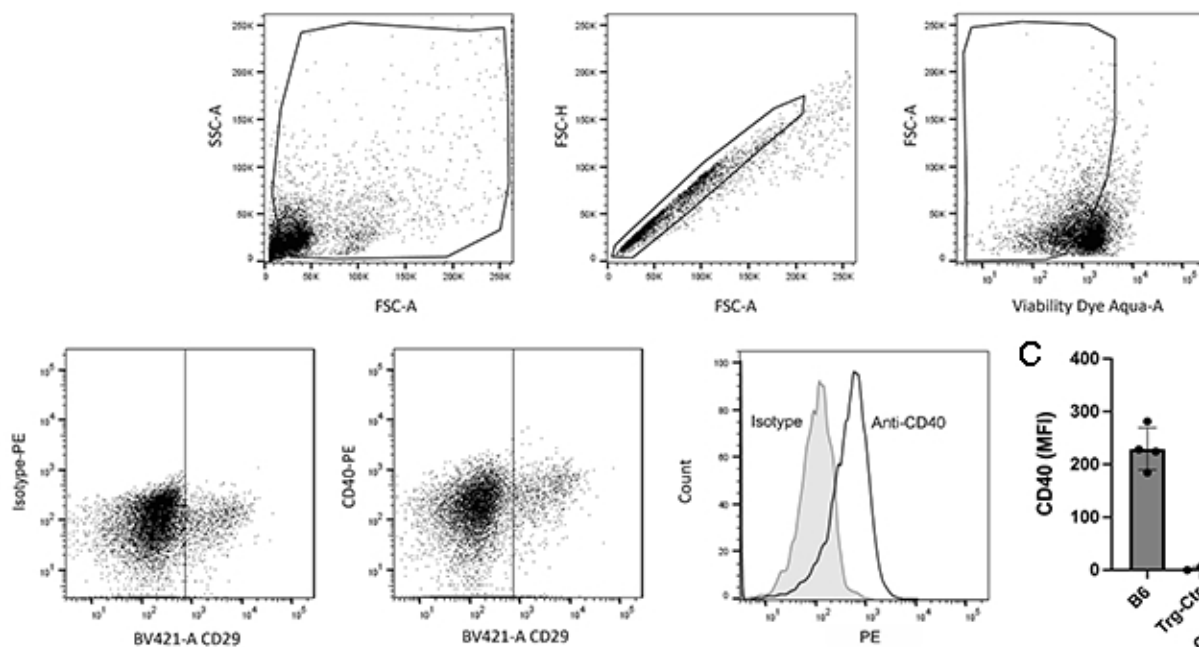

**c**

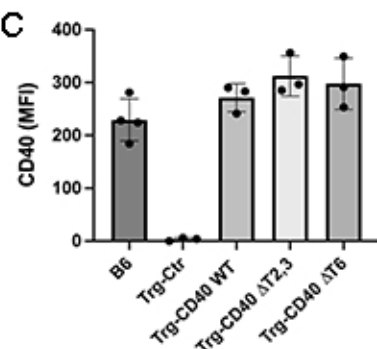

**ESM Fig. 2.** Transgenic mice with expression of CD40 WT or CD40 with mutations in the TRAF binding sites. *a*, CD40 expression in Müller cells (CRALBP+) from B6, single transgenic (Trg-Ctr) or double transgenic mice that express CD40 WT (Trg-CD40 WT), CD40  $\Delta$ T2,3 (Trg-CD40  $\Delta$ T2,3) or CD40  $\Delta$ T6 (Trg-CD40  $\Delta$ T6). Scale bar, 50  $\mu$ m. *b*, CD40 expression on Müller cells (CD29+) isolated from the retina as assessed by flow cytometry. Dot plot show gating strategy. CD40 was analyzed on live cells (did not stain with Aqua LIVE/DEAD kit) that were CD29+ (Müller cells). Dot plots and histogram shows representative CD40 expression in a B6 mouse. *c*, Graph bars shows mean + SEM of CD40 mean fluorescence intensity (3-4 mice per group).



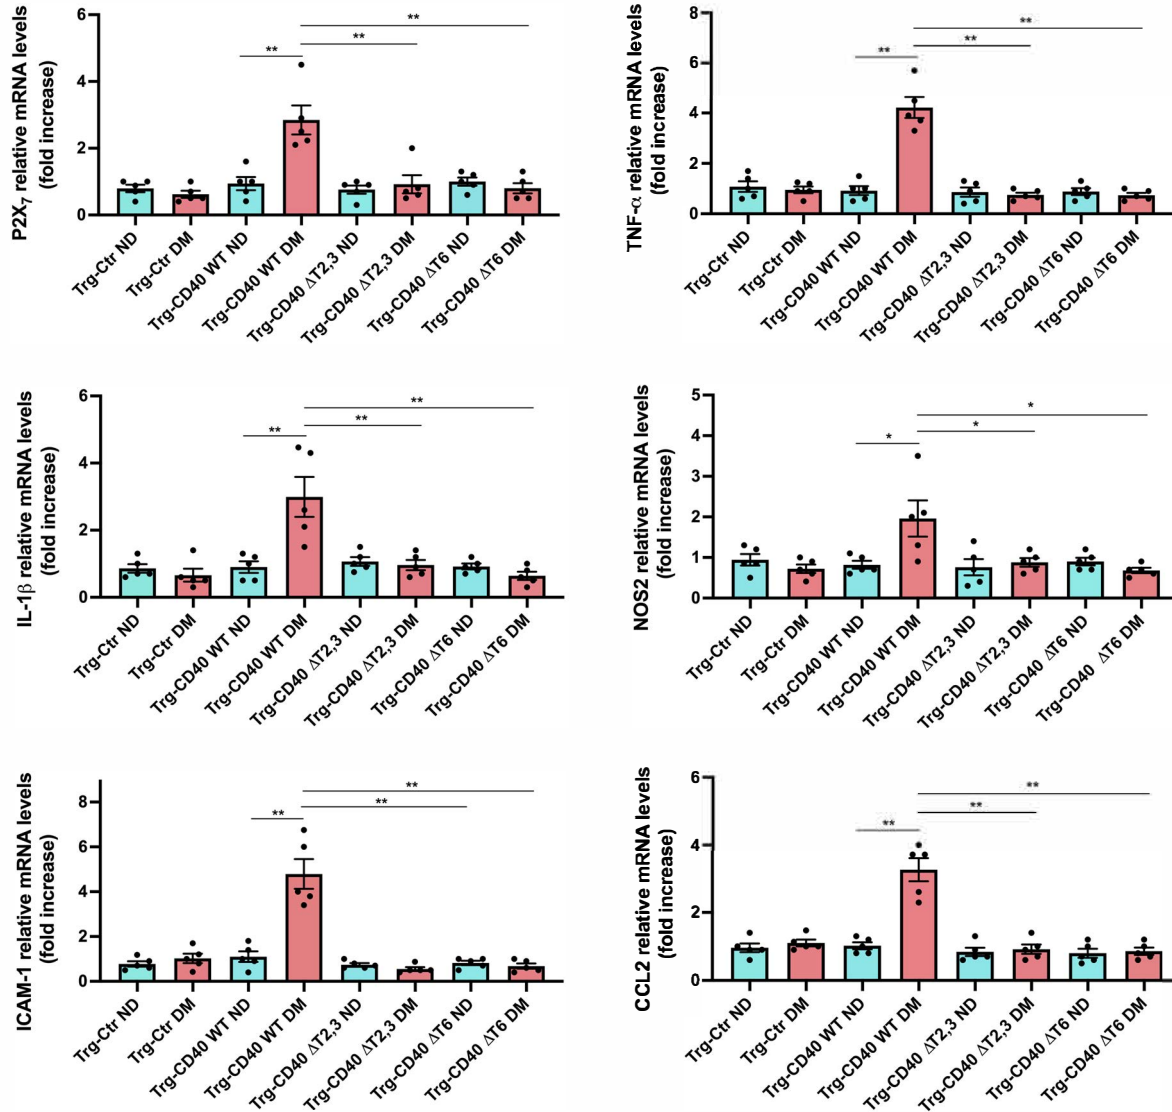

**ESM Figure 3.** Expression of CD40  $\Delta$ T6 in Müller cells from diabetic mice prevents upregulation of *P2X<sub>7</sub>*, *Tnf- $\alpha$* , *Il-1 $\beta$* , *Nos2*, *Icam-1* and *CCL2* mRNA in the retina. At 2 m of diabetes, mRNA levels were assessed by real time quantitative PCR using 18S rRNA as internal control. One non-diabetic B6 mouse was given an arbitrary value of 1 and data are expressed as fold-increase compared to this animal. Horizontal bars represent mean  $\pm$  SEM. 5 animals per group. \* P < 0.05, \*\* P < 0.01 by ANOVA.
